# Supplementary material
Source: PubMed Central journal article supplement (PMC3511065)
Supplement: 1207514109_pnas.201207514SI.pdf [file 1207514109_pnas.201207514SI.pdf]

# Supporting Information

Taylor et al. 10.1073/pnas.1207514109

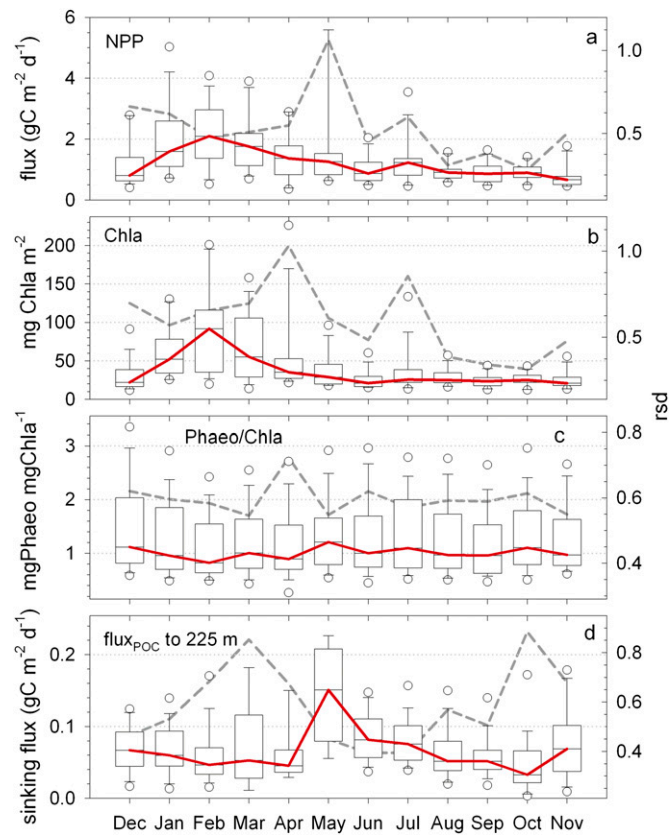

**Fig. S1.** Box and whisker plots depicting variations in mean annual cycles of net primary production (NPP) (A), Chla concentrations (B), *phaeo*:Chla ratios (C), and vertical flux of POC to sediment trap deployed at 225 m (D). Boxes represent the interquartile ranges of all observations (25th to 75th percentiles). Internal horizontal lines, whiskers, and open circles are medians, 10th to 90th, and 5th to 95th percentiles, respectively. Red curves connect medians and broken gray curves represent relative SDs ( $\text{rsd} = \text{SD}/\text{mean}$ ) computed for each month among all years ( $n = 13\text{--}14$  y).











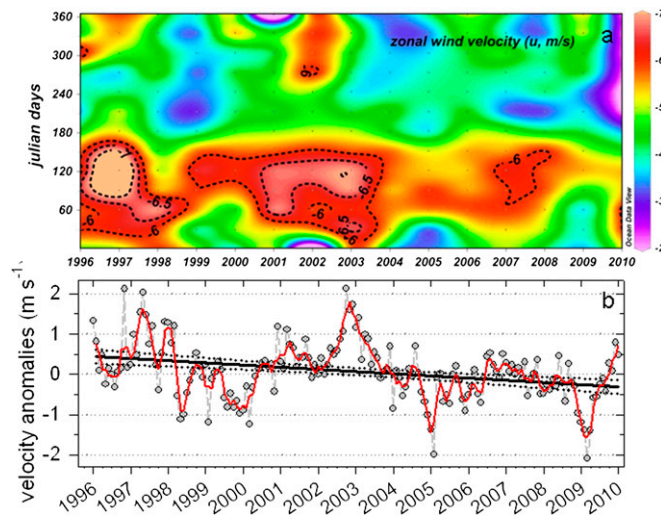

**Fig. S10.** Temporal variations in upwelling-favorable zonal wind velocities ( $-u$ ) presented as monthly means of meteorological station velocity and direction measurements on Margarita Island, Venezuela. (A) Climatology of  $u$  over 15-y record illustrating changing seasonal pattern (negative  $u$  values indicate easterlies). (B) Time-series of deseasonalized monthly mean wind speeds. Red line in B is three-point running means used for regression analysis. Dotted lines enveloping slopes are 95% confidence intervals.

**Table S1. Relationship of e-Ratio to time, meteorological, hydrographic, and biotic variables as determined by linear regression analyses**

| Variable                                                     | Equation                                              | $r^2$ | $P$    | $n$ |
|--------------------------------------------------------------|-------------------------------------------------------|-------|--------|-----|
| Zonal winds ( $\text{m}\cdot\text{s}^{-1}$ )                 | ns                                                    | ns    | ns     | 121 |
| 21 °C isotherm depth (m)                                     | e-Ratio = $3.2 + 0.04 Z_{21} \text{ } ^\circ\text{C}$ | 0.06  | <0.01  | 116 |
| Brunt-Väisälä stability (cycles/h)                           | e-Ratio = $0.7 + 0.18 \text{ stability}$              | 0.06  | <0.01  | 119 |
| $\text{PO}_4^{3-}$ ( $\text{mmol}\cdot\text{m}^{-2}$ )       | e-Ratio = $11 - 0.13 \text{ PO}_4^{3-}$               | 0.10  | <0.001 | 116 |
| $\text{Si}[\text{OH}]_4$ ( $\text{mmol}\cdot\text{m}^{-2}$ ) | e-Ratio = $10 - 0.012 \text{ Si}$                     | 0.08  | <0.005 | 117 |
| NPP ( $\text{mg C}\cdot\text{m}^{-2}\cdot\text{d}^{-1}$ )    | e-Ratio = $5.8 \text{ NPP}^{-0.92}$                   | 0.46  | <0.001 | 123 |

e-Ratio is defined here as: (POC captured in 225 m of sediment trap  $\div$  net primary productivity)  $\times$  100. ns, not significant ( $P$  value  $>$  0.05).

**Table S2. Bivariate Pearson correlation matrix of deseasonalized trends among locally observed surface ocean conditions at the CARIACO time-series station based on annual averages for each year ( $n = 14\text{--}15$  y)**

|                                  | SST                 | Local precip | ENSO MEI-1 | Upwell      | Mean density ( $\sigma_\theta$ ) | Buoyancy frequency  | $\text{PO}_4^{3-}$  | NPP                 | Chla                |
|----------------------------------|---------------------|--------------|------------|-------------|----------------------------------|---------------------|---------------------|---------------------|---------------------|
| Zonal wind                       | <b><u>-0.72</u></b> | ns           | 0.49       | -0.48       | <b>0.67</b>                      | <b><u>-0.80</u></b> | 0.47                | <b>0.66</b>         | <b>0.60</b>         |
| SST                              |                     | ns           | -0.50      | <b>0.64</b> | <b><u>-0.89</u></b>              | <b>0.85</b>         | <b><u>-0.64</u></b> | <b><u>-0.56</u></b> | <b><u>-0.79</u></b> |
| Local precip                     |                     |              | ns         | ns          | 0.46                             | ns                  | ns                  | ns                  | ns                  |
| ENSO MEI-1                       |                     |              |            | ns          | 0.52                             | <b><u>-0.54</u></b> | ns                  | <b>0.60</b>         | <b>0.54</b>         |
| Upwell                           |                     |              |            |             | <b><u>-0.67</u></b>              | ns                  | <b><u>-0.90</u></b> | <b><u>-0.58</u></b> | ns                  |
| Mean density ( $\sigma_\theta$ ) |                     |              |            |             |                                  | <b><u>-0.82</u></b> | <b>0.69</b>         | <b>0.56</b>         | <b>0.57</b>         |
| Buoyancy frequency               |                     |              |            |             |                                  |                     | ns                  | <b><u>-0.56</u></b> | <b><u>-0.72</u></b> |
| $\text{PO}_4^{3-}$               |                     |              |            |             |                                  |                     |                     | <b>0.64</b>         | ns                  |
| NPP                              |                     |              |            |             |                                  |                     |                     |                     | <b>0.65</b>         |

Statistical significance levels are specified as follows:  $>90\%$ ,  $>95\%$  (bold),  $>99\%$  (bold-underline); and  $<90\%$  (ns, not significant). Analysis was performed on annual means of monthly departures (1996–2009) from long-term means (anomalies). Buoyancy frequency (Brunt-Väisälä), mean level of stratification in upper 100 m (cycles/h); Chla, integrated chlorophyll a biomass ( $\text{mg Chla}\cdot\text{m}^{-2}$ ); ENSO MEI-1, lagged 1 y behind multivariate ENSO index; local precip, monthly rainfall on Margarita Island (mm); mean density ( $\sigma_\theta$ ),  $\text{kg}\cdot\text{m}^{-3}$  in upper 100 m; NPP, integrated net primary productivity ( $\text{g C}\cdot\text{m}^{-2}\cdot\text{d}^{-1}$ );  $\text{PO}_4^{3-}$ , integrated dissolved phosphate inventories in upper 100 m ( $\text{mol PO}_4^{3-}\cdot\text{m}^{-2}$ ); SST, SST in upper 4 m ( $^\circ\text{C}$ ); upwell, depth of the 21 °C isotherm (m); zonal wind, monthly average  $-u$  ( $\text{m}\cdot\text{s}^{-1}$  of easterly winds).
